# Supplementary material for: Study of the RAFT homopolymerization and copolymerization of N-[3-(dimethylamino)propyl]methacrylamide hydrochloride and evaluation of the cytotoxicity of the resulting homo- and copolymers
Source: Royal Society of Chemistry journal article supplement (doi:10.1039/c7py00837f), 2017-01-01
Supplement: c7py00837f1.pdf [file c7py00837f1.pdf]

## Electronic Supplementary Information (ESI)

### **Study of the RAFT homopolymerization and copolymerization of *N*-[3-(dimethylamino)propyl]-methacrylamide hydrochloride and evaluation of the cytotoxicity of the resulting homo- and copolymers**

Pratyawadee Singhsa,<sup>a,b</sup> Hathaikarn Manuspiya<sup>a</sup> and Ravin Narain<sup>\*b</sup>

<sup>a</sup> *Department of Chemical and Materials Engineering, Donadeo Innovation Centre for Engineering, Edmonton, AB T6G 2G6, Canada. Email: narain@ualberta.ca*

<sup>b</sup> *The Petroleum and Petrochemical College, Center of Excellence on Petrochemical and Materials Technology, Chulalongkorn University, Soi Chulalongkorn 12, Pathumwan, Bangkok 10330, Thailand.*

**Table S1** Effect of CTP/ACVA ratio on synthesis of p(DMAPMA.HCl)-based macroCTA and consequent effect of monomer concentration on the self-chain extension of DMAPMA.HCl

| Sample    | MacroCTA (Block 1) |        |                         |           | Self-chain extension (Block 2) |        |                         |           |
|-----------|--------------------|--------|-------------------------|-----------|--------------------------------|--------|-------------------------|-----------|
|           | [CTP]/[ACVA]       | %Conv. | $M_n$ ( $\times 10^4$ ) | $M_w/M_n$ | [DMAPMA.HCl]                   | %Conv. | $M_n$ ( $\times 10^4$ ) | $M_w/M_n$ |
| pDD-2-0.2 | 2                  | 65     | 1.35                    | 1.21      | 0.2 M                          | 92     | 3.25                    | 1.34      |
| pDD-2-0.5 | 2                  | 65     | 1.35                    | 1.21      | 0.5 M                          | 95     | 3.31                    | 1.37      |
| pDD-5-0.2 | 5                  | 60     | 1.25                    | 1.18      | 0.2 M                          | 70     | 2.68                    | 1.29      |
| pDD-5-0.5 | 5                  | 60     | 1.25                    | 1.18      | 0.5 M                          | 74     | 2.77                    | 1.31      |

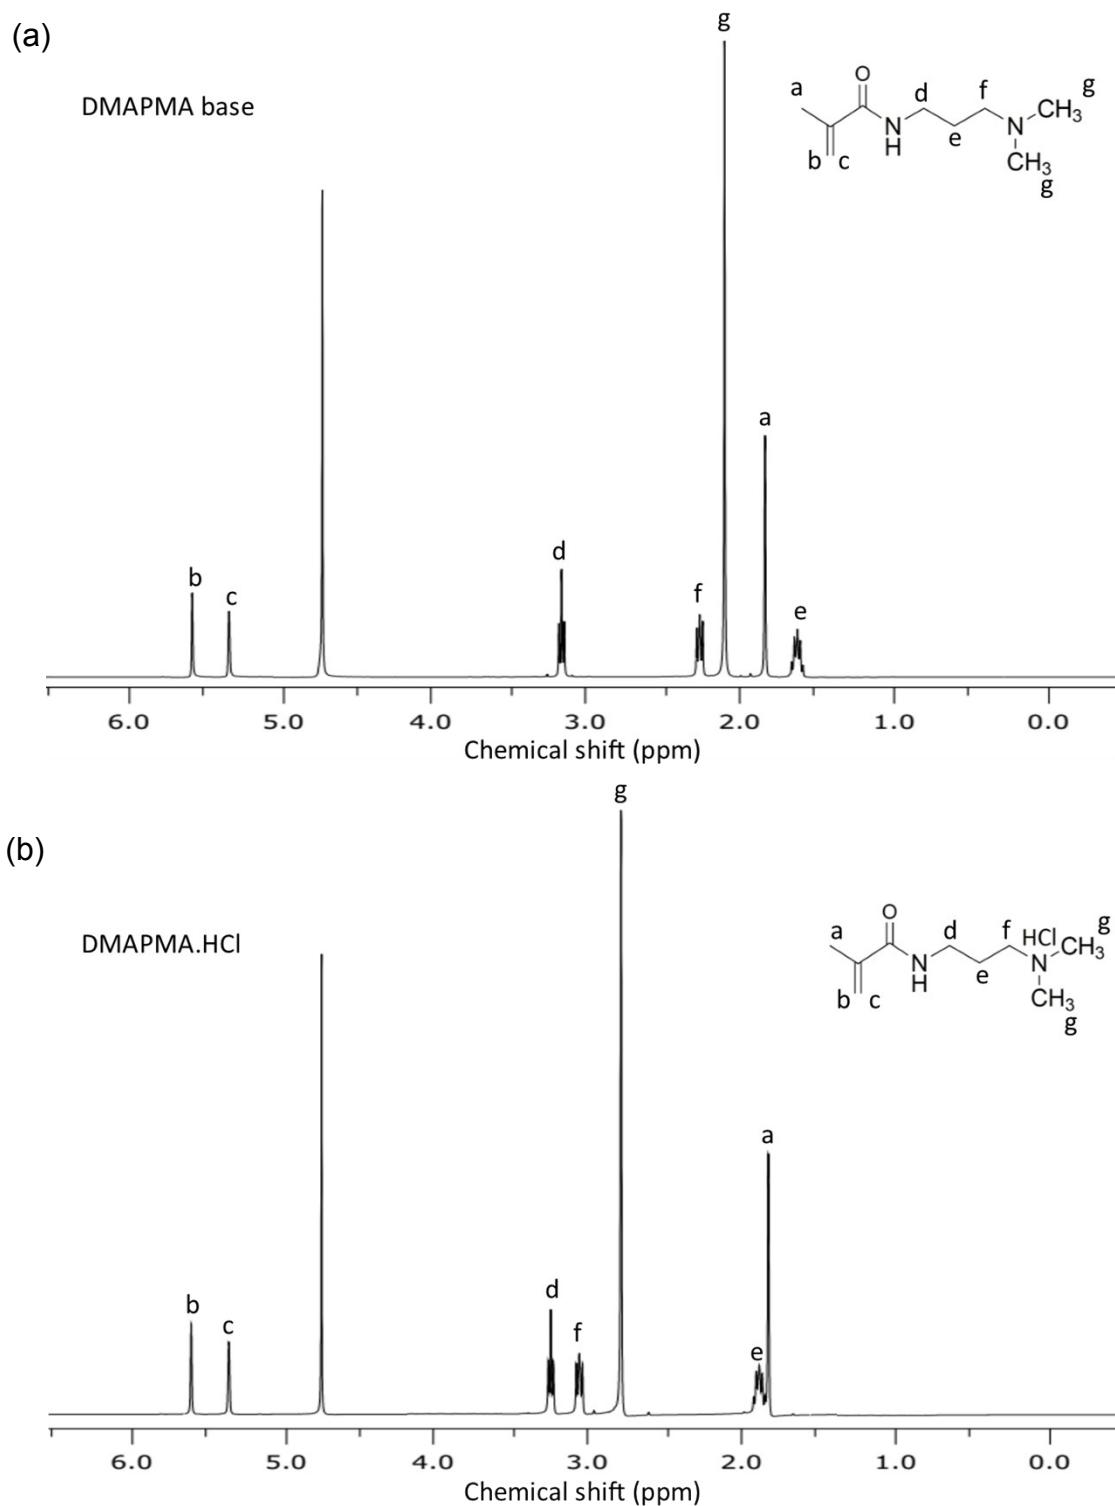

**Fig. S1**  $^1\text{H}$  NMR spectra of (a) DMAPMA base monomer, (b) DMAPMA.HCl monomer.

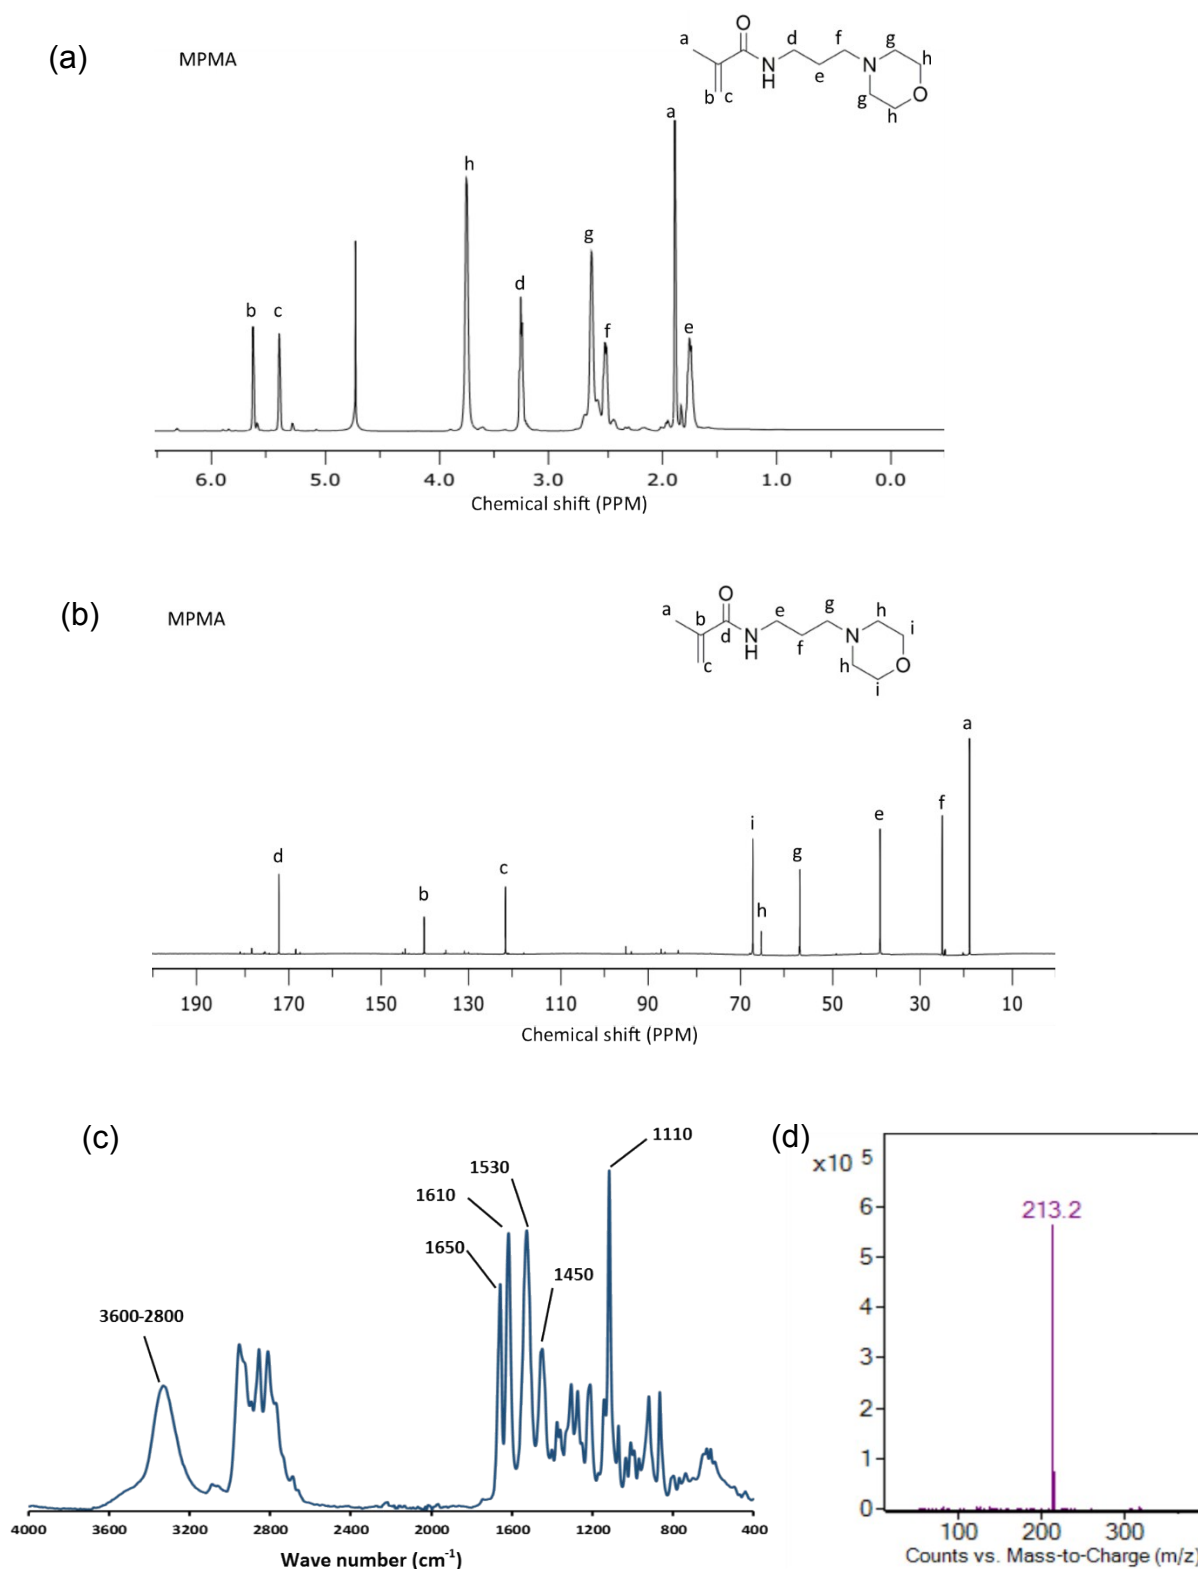

**Fig. S2** Characterization of MPMA monomer: (a)  $^1\text{H}$  NMR spectra, (b)  $^{13}\text{C}$  NMR spectra, (c) FT-IR spectra, and (d) LC-ESI-MS spectra.

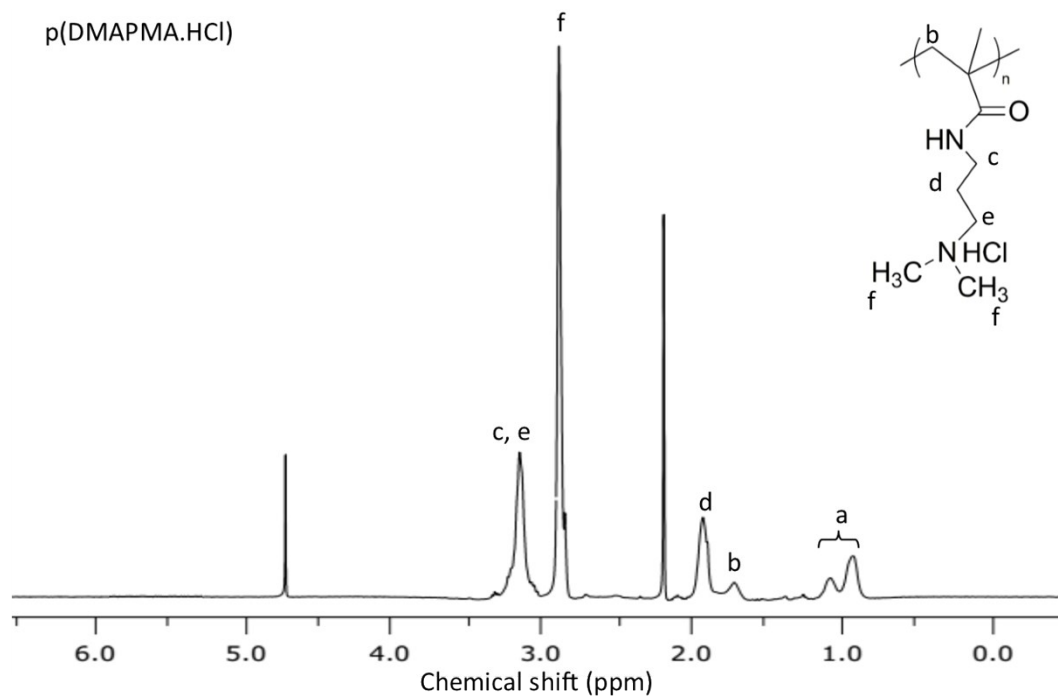

**Fig. S3**  $^1\text{H}$  NMR spectra of p(DMAPMA.HCl).

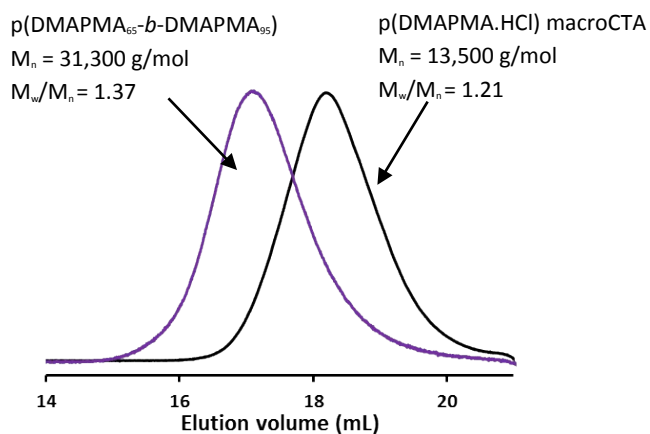

**Fig. S4** GPC traces of p(DMAPMA.HCl)-based macroCTA and self-chain extension reaction with  $[\text{CTP}]/[\text{ACVA}] = 2/1$  and monomer concentration of 0.5 M at 70 °C in the solvent mixture of acidic water/2-propanol = 2:1.

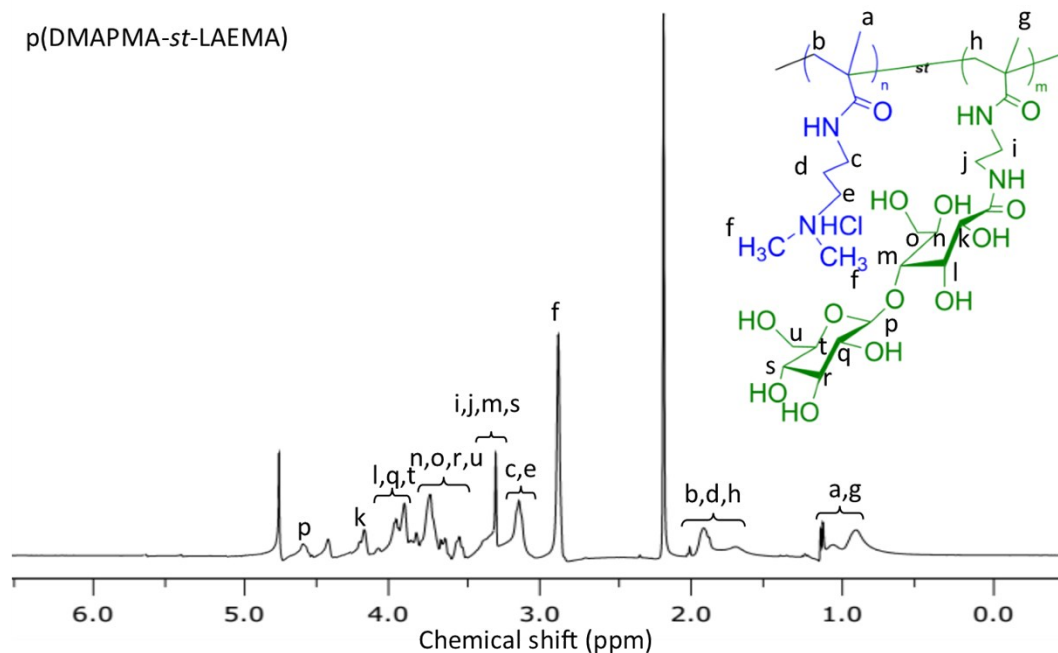

**Fig. S5** <sup>1</sup>H NMR spectra of p(DMAPMA-*st*-LAEMA).

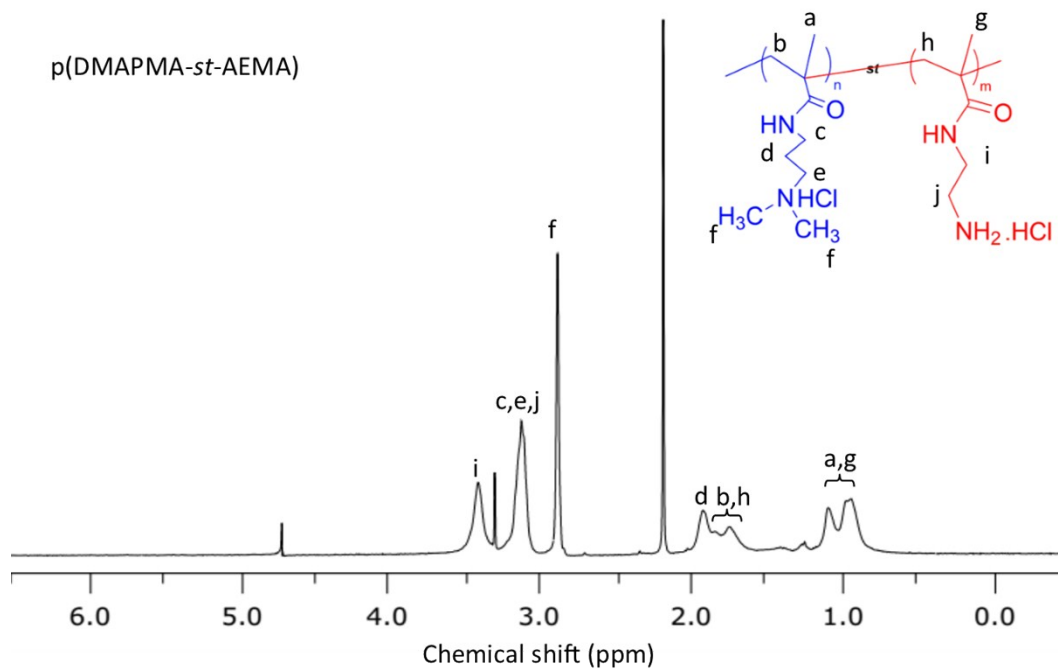

**Fig. S6** <sup>1</sup>H NMR spectra of p(DMAPMA-*st*-AEMA).

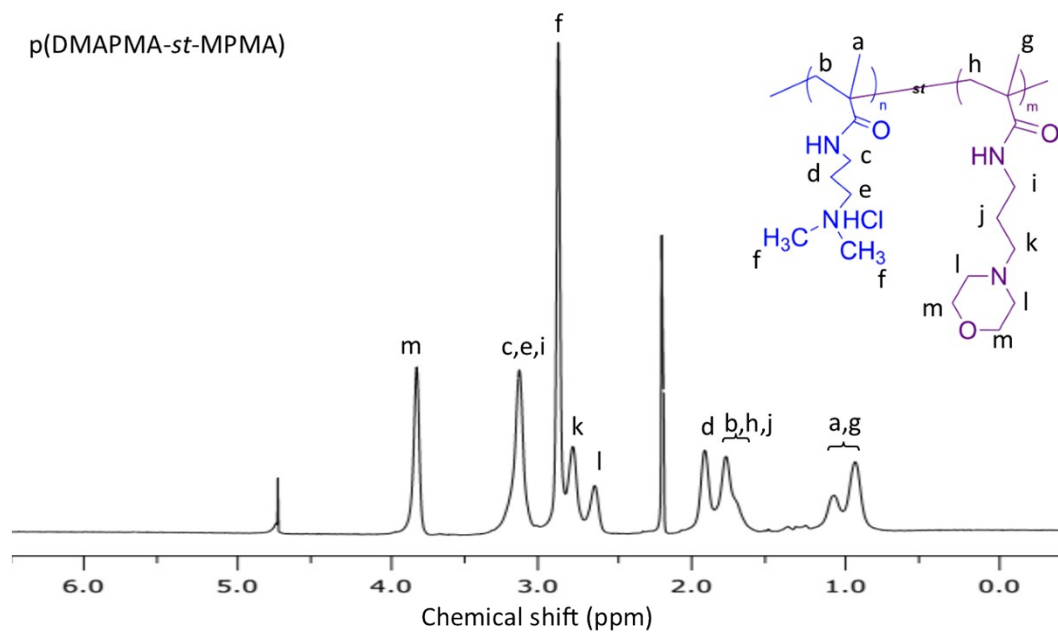

**Fig. S7** <sup>1</sup>H NMR spectra of p(DMAPMA-*st*-MPMA).

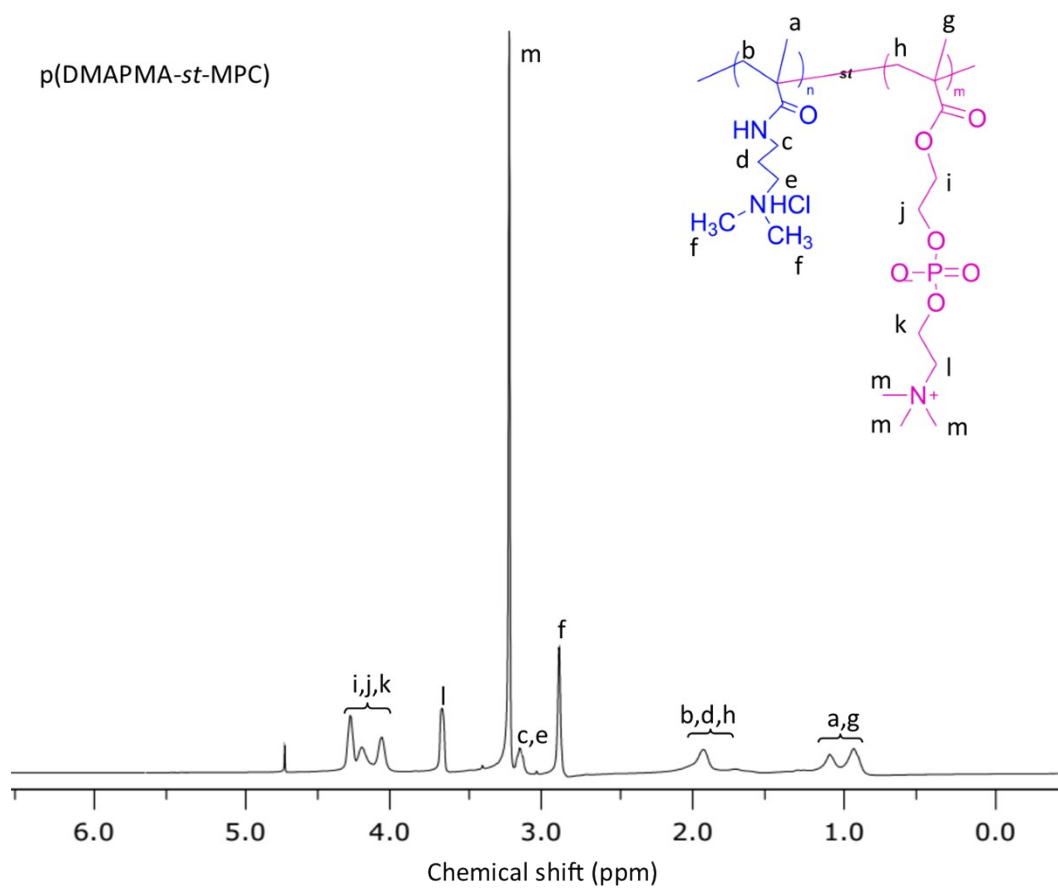

**Fig. S8** <sup>1</sup>H NMR spectra of p(DMAPMA-*st*-MPC).
